# Supplementary material
Source: MDPI journal article supplement (https://www.mdpi.com/2076-3417/11/20/9445)
Supplement: s1 [file s1]

# Supplementary Materials: Biological *Diabrotica* Management and Monitoring of *Metarhizium* Diversity in Austrian Maize Fields Following Mass Application of the Entomopathogen *Metarhizium brunneum*

Maria Zottele <sup>1,\*</sup>, Johanna Mayerhofer <sup>2</sup>, Hannah Embleton <sup>1</sup>, Katharina Wechselberger <sup>3</sup>, Jürg Enkerli <sup>2</sup> and Hermann Strasser <sup>1</sup>

## 1. Supplementary Information

**Table S1.** Radial growth (mm) of production strain BIPESCO 5 and isolates from Styria after 14d incubation on Sabouraud-4%-Glucose agar media. Each isolate was tested three times per temperature. Exact temperatures of climate chambers were 19.6 °C (±0.1), 24.7 °C (±0.6), 30.2 °C (±1.0) and 35.3 °C (±0.5).

| Isolate   | Species                       | Incubation temperature |             |             |             |
|-----------|-------------------------------|------------------------|-------------|-------------|-------------|
|           |                               | 20 °C                  | 25 °C       | 30 °C       | 35 °C       |
| BIPESCO 5 | <i>Metarhizium brunneum</i>   | 48.7 (±0.6)            | 66.7 (±0.6) | 41.2 (±0.8) | 0.0 (±0.0)  |
| MLG 7     | <i>Metarhizium robertsii</i>  | 37.0 (±1.0)            | 49.7 (±0.6) | 50.2 (±0.3) | 4.7 (±0.8)  |
| MLG 9     | <i>Metarhizium lepidiotae</i> | 20.2 (±0.8)            | 32.3 (±0.6) | 64.3 (±0.6) | 13.3 (±0.6) |
| MLG 11    | <i>Metarhizium lepidiotae</i> | 21.0 (±0.0)            | 37.3 (±0.6) | 36.2 (±0.3) | 6.0 (±0.0)  |
| MLG 12    | <i>Metarhizium lepidiotae</i> | 11.0 (±0.0)            | 19.3 (±0.6) | 32.0 (±0.0) | 11.7 (±0.6) |
| MLG 15    | <i>Metarhizium brunneum</i>   | 47.0 (±0.0)            | 57.8 (±1.6) | 53.3 (±0.6) | 0.0 (±0.0)  |
| MLG 25    | <i>Metarhizium robertsii</i>  | 48.3 (±1.5)            | 67.3 (±0.6) | 67.5 (±0.5) | 1.3 (±1.5)  |
| MLG 31    | <i>Metarhizium robertsii</i>  | 45.8 (±0.4)            | 66.8 (±1.8) | 65.0 (±1.0) | 2.8 (±1.8)  |
| MLG 32    | <i>Metarhizium brunneum</i>   | 38.3 (±0.6)            | 48.3 (±1.2) | 51.7 (±1.2) | 1.0 (±0.0)  |

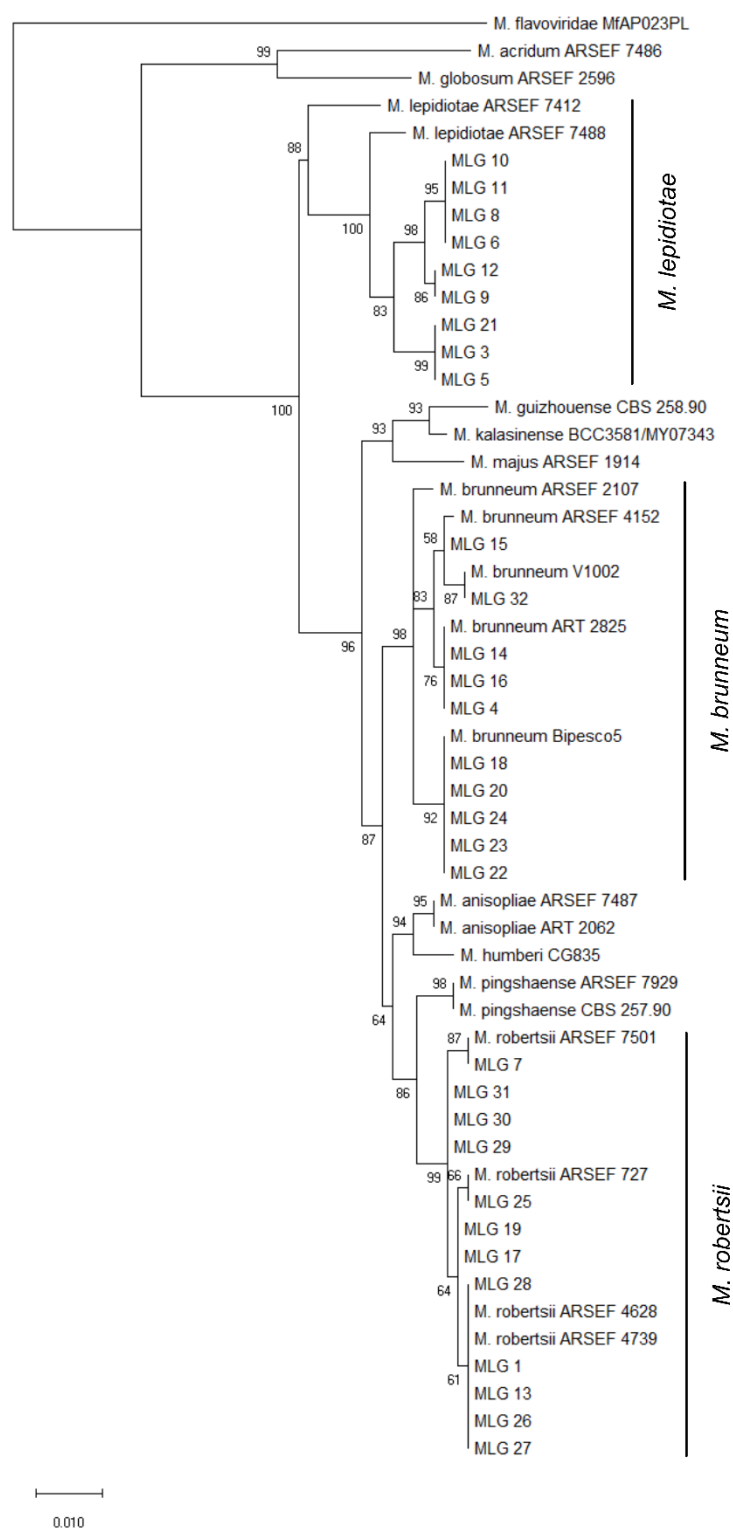

**Figure S1.** Maximum likelihood phylogenetic tree based on the alignment of 5'-TEF-1 $\alpha$  sequences representing 31 different multilocus genotypes (MLG) isolated from the soil (MLG 24 representing the applied strain BIPESCO 5) and reference strains with a total of 672 positions in the final dataset.
